# Supplementary material
Source: publisher site journal article supplement (https://www.degruyter.com/publication/isbn/9781934078471/downloadAsset/9781934078471_Contents.pdf)
Supplement: Supplementary file 1 [file 9781934078471_Contents.pdf]

## **Table of Contents**

List of Figures

List of Tables

List of Contributors

1. A Contextual Archaeology of Ancient Greece

*Donald C. Haggis and Carla M. Antonaccio*

## **Historical Contexts and Intellectual Traditions**

2. Scholarly Traditions and Scientific Paradigms: Method and Reflexivity in the Study of Ancient Praisos

*James Whitley*

3. Reexcavating Morgantina

*Carla M. Antonaccio*

4. A Defective Master Narrative in Greek Archaeology

*David Small*

5. Lycia and Classical Archaeology: The Changing Nature of Archaeology in Turkey

*Tamar Hodos*

## **Mortuary Contexts**

6. Shedding Light on Early Archaic Attika via the Evidence of Mortuary Practices: The Case of the Offering Trenches

*Alexandra Alexandridou*

7. The Potential and Limitations of Bioarchaeological Investigations in Classical Contexts in Greece: An Example from the *Polis* of Athens

*Anna Lagia*

## **Urban and Rural Contexts**

8. The Greek Agora in its Peloponnesian Context(s)

*Jamieson C. Donati*

9. The Archaeology of Urbanization: Research Design and the Excavation of an Archaic Greek City on Crete

*Donald C. Haggis*

10. Exploring the Ancient Demos of Kymissaleis on Rhodes: Multidisciplinary Experimental Research and Theoretical Issues

*Manolis I. Stefanakis, Konstantinos Kalogeropoulos, Andreas Georgopoulos, and Chryssi Bourbou*

11. The Hellenistic Settlement on Prophitis Elias Hill at Arkalochori, Crete: Preliminary Remarks

*Kalliope E. Galanaki, Christina Papadaki, and Kostis S. Christakis*

12. Cultivating Classical Archaeology: Agricultural Activities, Use of Space and Occupation Patterns in Hellenistic Greece

*Evi Margaritis*

### **Sanctuary Contexts**

13. Detecting Patterns through Context Analysis: The Case Study of Deposits in the Sanctuary of Eukleia at Vergina

*Athanasia Kyriakou and Alexandros Tourtas*

14. From Fishbones to Fishermen: Views from the Sanctuary of Poseidon at Kalaureia

*Dimitra Mylona*

Index
